# Supplementary material
Source: ML conference proceedings conference paper supplement (https://aclanthology.org/D18-1005)
Supplement: Attachment [file supplementary.pdf › supplementary.pdf]

## 11 Supplemental Material

In this section, we include specific details of our Aggression and Loss lexicon, which we refer to as SPLex.

### 11.1 Seed Sets

This table lists the full seed sets generated by our annotators for Aggression and Loss.

|         |                                                                                                                                                                                                                                                                                                                                                                               |
|---------|-------------------------------------------------------------------------------------------------------------------------------------------------------------------------------------------------------------------------------------------------------------------------------------------------------------------------------------------------------------------------------|
| Aggress | 'angry', 'opps', 'opp', 'fu', 'fuck',<br>'bitch', 'smoke', 'pipe', 'glock',<br>'play', 'missin', 'bang', 'smack',<br>'slap', 'beat', 'blood', 'bust',<br>'bussin', 'heat', 'BDK', 'GDK',<br>'snitch', 'cappin', 'killa', 'kill',<br>'hitta', 'hittas', 'shooter', 'tf'                                                                                                        |
| Loss    | 'free', 'rip', 'longlive', 'LL', 'rest',<br>'up', 'restup', 'crying', 'cry', 'fly',<br>'flyhigh', 'fallin', 'bip', 'day', 'why',<br>'funeral', 'sleep', 'miss', 'king',<br>'hurt', 'gone', 'cant', 'believe',<br>'death', 'dead', 'died', 'lost', 'killed',<br>'grave', 'damn', 'soldier', 'soldiers',<br>'gang', 'bro', 'man', 'hitta', 'jail',<br>'blood', 'heaven', 'home' |

Table 4: Seed sets for Aggression and Loss
